# Supplementary material for: Henipavirus zoonosis: outbreaks, animal hosts and potential new emergence
Source: Front Microbiol. 2023 Jul 17;14:1167085. doi: 10.3389/fmicb.2023.1167085 (PMC10387552; doi:10.3389/fmicb.2023.1167085)
Supplement: Supplementary file 1 [file Table_S1.xlsx]

## Sheet: Sheet1
Table S1. Henipaviruses and henipa-like viruses: geographic locations, case numbers and CFRs of infections in humans and animals.
Virus	Country	City*	Latitude	Longitude	Infected species	Number infected	Number Died	CFR (%)	Notes	Reference
Hendra virus	Australia	Hendra	-27.4198	153.073	human;horse	2	1	50	20 horses died or were euthanised. Two people infected. One of them died.	https://apps.who.int/iris/bitstream/handle/10665/229819/WER7127_208-210.PDF
Hendra virus	Australia	Tewantin	-26.3733	153.024	horse	0	0	NA	Death of one horse	https://www.business.qld.gov.au/industries/service-industries-professionals/service-industries/veterinary-surgeons/guidelines-hendra/incident-summary
Hendra virus	Australia	Mount Alford	-28.0991	152.591	horse	0	0	NA	Death of three horses (all confirmed to have died of hendra) and sero-conversion of a dog.	https://www.business.qld.gov.au/industries/service-industries-professionals/service-industries/veterinary-surgeons/guidelines-hendra/incident-summary
Hendra virus	Australia	Cawarral	-23.2905	150.617	human;horse	1	1	100	Death of four horses. Queensland veterinary surgeon alister rodgers tested positive after treating the horses. On 1 september 2009 after two weeks in a coma, he became the fourth person to die from exposure to the virus.	https://www.health.nsw.gov.au/Infectious/controlguideline/Pages/hendra-case-summary.aspx
Hendra virus	Australia	Mackay	-21.1535	149.165	human;horse	1	1	100	Death of two horses and one person	https://apps.who.int/iris/bitstream/handle/10665/229819/WER7127_208-210.PDF
Hendra virus	Australia	Mcleans Ridges	-28.7947	153.361	horse	0	0	NA	Death of one horse. The second horse on the property tested positive to hendra and was euthanised on 12 july 2011.	https://www.business.qld.gov.au/industries/service-industries-professionals/service-industries/veterinary-surgeons/guidelines-hendra/incident-summary
Hendra virus	Australia	Macksville	-30.7169	152.918	horse	0	0	NA	Death of one horse	https://www.business.qld.gov.au/industries/service-industries-professionals/service-industries/veterinary-surgeons/guidelines-hendra/incident-summary
Hendra virus	Australia	Park Ridge	-27.7043	153.045	horse	0	0	NA	Death of one horse	https://www.business.qld.gov.au/industries/service-industries-professionals/service-industries/veterinary-surgeons/guidelines-hendra/incident-summary
Hendra virus	Australia	Kuranda	-16.8189	145.637	horse	0	0	NA	Death of one horse	https://www.business.qld.gov.au/industries/service-industries-professionals/service-industries/veterinary-surgeons/guidelines-hendra/incident-summary
Hendra virus	Australia	Hervey Bay	-25.2833	152.849	horse	0	0	NA	Death of one horse	https://www.business.qld.gov.au/industries/service-industries-professionals/service-industries/veterinary-surgeons/guidelines-hendra/incident-summary
Hendra virus	Australia	Lismore	-28.812	153.278	horse	0	0	NA	Death of one horse	https://www.business.qld.gov.au/industries/service-industries-professionals/service-industries/veterinary-surgeons/guidelines-hendra/incident-summary
Hendra virus	Australia	Boondall	-27.347	153.062	horse	0	0	NA	Death of one horse	https://www.business.qld.gov.au/industries/service-industries-professionals/service-industries/veterinary-surgeons/guidelines-hendra/incident-summary
Hendra virus	Australia	Chinchilla	-26.737	150.628	horse	0	0	NA	Death of one horse	https://www.business.qld.gov.au/industries/service-industries-professionals/service-industries/veterinary-surgeons/guidelines-hendra/incident-summary
Hendra virus	Australia	Mullumbimby	-28.553	153.5	horse	0	0	NA	Death of one horse	https://www.business.qld.gov.au/industries/service-industries-professionals/service-industries/veterinary-surgeons/guidelines-hendra/incident-summary
Hendra virus	Australia	Mullumbimby	-28.553	153.5	horse	0	0	NA	Death of one horse. A horse was found dead after being unwell the day before. Hev infection was confirmed on 17 august 2011.	https://www.business.qld.gov.au/industries/service-industries-professionals/service-industries/veterinary-surgeons/guidelines-hendra/incident-summary
Hendra virus	Australia	Ballina	-28.867	153.567	horse	0	0	NA	Death of one horse	https://www.business.qld.gov.au/industries/service-industries-professionals/service-industries/veterinary-surgeons/guidelines-hendra/incident-summary
Hendra virus	Australia	South Ballina	-28.9	153.583	horse	0	0	NA	Death of two horses. The horses were found dead in a field. Both tested positive to hev. The exact date of death is not known, but hev infection was confirmed on 17 august 2011.	https://www.business.qld.gov.au/industries/service-industries-professionals/service-industries/veterinary-surgeons/guidelines-hendra/incident-summary
Hendra virus	Australia	Currumbin Valley	-28.22	153.438	horse	0	0	NA	Death of one horse	https://www.business.qld.gov.au/industries/service-industries-professionals/service-industries/veterinary-surgeons/guidelines-hendra/incident-summary
Hendra virus	Australia	Ballina North	-28.87	153.585	horse	0	0	NA	Death of one horse	https://www.business.qld.gov.au/industries/service-industries-professionals/service-industries/veterinary-surgeons/guidelines-hendra/incident-summary
Hendra virus	Australia	Beachmere	-27.138	153.07	horse	0	0	NA	One horse euthanised after testing positive. A horse that died on the property one week before may have died of hev. On 15 october 2011 another horse on the property was euthanised following a positive hev antibody test.	https://www.business.qld.gov.au/industries/service-industries-professionals/service-industries/veterinary-surgeons/guidelines-hendra/incident-summary
Hendra virus	Australia	Townsville	-19.257	146.814	horse	0	0	NA	A horse that died or was euthanised on 3 january 2012 returned a positive hev test on 5 january 2012.	https://www.business.qld.gov.au/industries/service-industries-professionals/service-industries/veterinary-surgeons/guidelines-hendra/incident-summary
Hendra virus	Australia	Rockhampton	-23.381	150.506	horse	0	0	NA	One horse died	https://www.business.qld.gov.au/industries/service-industries-professionals/service-industries/veterinary-surgeons/guidelines-hendra/incident-summary
Hendra virus	Australia	Ingham	-18.654	146.165	horse	0	0	NA	One horse died. A dog returned a positive test but was subsequently cleared.	https://www.business.qld.gov.au/industries/service-industries-professionals/service-industries/veterinary-surgeons/guidelines-hendra/incident-summary
Hendra virus	Australia	Rockhampton	-23.381	150.506	horse	0	0	NA	One horse died. On 27 july it was announced that two other horses on the property, showing clinical signs of the disease, had been euthanised. Two dogs were assessed, and the property was quarantined.	https://www.business.qld.gov.au/industries/service-industries-professionals/service-industries/veterinary-surgeons/guidelines-hendra/incident-summary
Hendra virus	Australia	Mackay	-21.153	149.184	horse	0	0	NA	One horse was euthanised after returning a positive hev test. 15 horses on the property are being tested and quarantined, along with horses on neighbouring properties.	https://www.business.qld.gov.au/industries/service-industries-professionals/service-industries/veterinary-surgeons/guidelines-hendra/incident-summary
Hendra virus	Australia	Cairns	-16.925	145.775	horse	0	0	NA	One horse died.	https://www.business.qld.gov.au/industries/service-industries-professionals/service-industries/veterinary-surgeons/guidelines-hendra/incident-summary
Hendra virus	Australia	Port Douglas	-16.485	145.467	horse	0	0	NA	One horse died. The property with 13 other horses is quarantined.	https://www.business.qld.gov.au/industries/service-industries-professionals/service-industries/veterinary-surgeons/guidelines-hendra/incident-summary
Hendra virus	Australia	Ingham	-18.654	146.165	horse	0	0	NA	One symptomatic horse euthanised. A test for hev the following day proved positive. The property, with seven other horses, quarantined.	https://www.business.qld.gov.au/industries/service-industries-professionals/service-industries/veterinary-surgeons/guidelines-hendra/incident-summary
Hendra virus	Australia	Mackay	-21.153	149.184	horse	0	0	NA	One horse died.	https://www.business.qld.gov.au/industries/service-industries-professionals/service-industries/veterinary-surgeons/guidelines-hendra/incident-summary
Hendra virus	Australia	Atherton Tablelands	-17.247	145.467	horse	0	0	NA	One horse died. Four horses and four people from the property were assessed.	https://www.business.qld.gov.au/industries/service-industries-professionals/service-industries/veterinary-surgeons/guidelines-hendra/incident-summary
Hendra virus	Australia	Trinity Beach	-16.8167	145.678	horse	0	0	NA	Death of one horse	https://onlinelibrary.wiley.com/doi/10.1111/j.1751-0813.2000.tb11758.x
Hendra virus	Australia	Gordonvale	-17.1002	145.784	horse	1	0	0	Death of one horse. A veterinarian involved in autopsy of the horse was infected with hendra virus, and suffered a mild illness.	https://onlinelibrary.wiley.com/doi/abs/10.5694/j.1326-5377.2006.tb00692.x
Hendra virus	Australia	Townsville	-19.2576	146.814	horse	0	0	NA	Death of one horse	https://www.business.qld.gov.au/industries/service-industries-professionals/service-industries/veterinary-surgeons/guidelines-hendra/incident-summary
Hendra virus	Australia	Peachester	-26.8625	152.857	horse	0	0	NA	Death of one horse	https://www.business.qld.gov.au/industries/service-industries-professionals/service-industries/veterinary-surgeons/guidelines-hendra/incident-summary
Hendra virus	Australia	Murwillumbah	-28.3285	153.389	horse	0	0	NA	Death of one horse	https://www.ncbi.nlm.nih.gov/pmc/articles/PMC3294518/
Hendra virus	Australia	Peachester	-26.8625	152.857	horse	0	0	NA	Infection of one horse (euthanised)	https://www.ncbi.nlm.nih.gov/pmc/articles/PMC3294518/
Hendra virus	Australia	Clifton Beach	-16.79	145.657	horse	0	0	NA	Infection of one horse (euthanised)	https://www.ncbi.nlm.nih.gov/pmc/articles/PMC3294518/
Hendra virus	Australia	Redlands	-27.6253	153.268	human;horse	2	1	50	Death of five horses; four died from the henda virus, the remaining animal recovered but was euthanised because of a government policy that requires all animals with antibodies to be euthanised due to a potential threat to health. Two veterinary workers from the affected property were infected leading to the death of one.	https://www.health.nsw.gov.au/Infectious/controlguideline/Pages/hendra-case-summary.aspx
Hendra virus	Australia	Proserpine	-20.402	148.586	horse	0	0	NA	Death of four horses	https://onlinelibrary.wiley.com/doi/10.1111/j.1751-0813.2000.tb11758.x
Hendra virus	Australia	Calliope	-23.846	151.257	horse	0	0	NA	Horse euthanised and property quarantined after outbreak.	https://www.business.qld.gov.au/industries/service-industries-professionals/service-industries/veterinary-surgeons/guidelines-hendra/incident-summary
Hendra virus	Australia	Bowen	-20.0131	148.241	horse	0	0	NA	Death of two horses	https://www.business.qld.gov.au/industries/service-industries-professionals/service-industries/veterinary-surgeons/guidelines-hendra/incident-summary
Hendra virus	Australia	Atherton Tableland	-17.247	145.467	horse	0	0	NA	Infected horse died and property quarantined.	https://www.business.qld.gov.au/industries/service-industries-professionals/service-industries/veterinary-surgeons/guidelines-hendra/incident-summary
Hendra virus	Australia	Lismore	-28.812	153.278	horse	0	0	NA	Infected horse euthanised and property quarantined.	https://www.business.qld.gov.au/industries/service-industries-professionals/service-industries/veterinary-surgeons/guidelines-hendra/incident-summary
Hendra virus	Australia	Kerry	-26.4394	152.665	horse	0	0	NA	The horse was moved after it became sick to another property at beaudesert, queensland. Death of one horse.	https://www.business.qld.gov.au/industries/service-industries-professionals/service-industries/veterinary-surgeons/guidelines-hendra/incident-summary
Hendra virus	Australia	Loganlea	-27.6844	153.119	horse	0	0	NA	Death of one horse. Unusually this horse had hev antibodies present in its blood at the time of death. How this immune response should be interpreted is a matter of debate.	https://www.business.qld.gov.au/industries/service-industries-professionals/service-industries/veterinary-surgeons/guidelines-hendra/incident-summary
Hendra virus	Australia	Lismore	-28.812	153.278	horse	0	0	NA	Hendra virus confirmed near lismore	https://www.business.qld.gov.au/industries/service-industries-professionals/service-industries/veterinary-surgeons/guidelines-hendra/incident-summary
Hendra virus	Australia	Murwillumbah	-28.329	153.396	horse	0	0	NA	Hendra virus confirmed near murwillumbah	https://www.business.qld.gov.au/industries/service-industries-professionals/service-industries/veterinary-surgeons/guidelines-hendra/incident-summary
Hendra virus	Australia	Lismore	-28.812	153.278	horse	0	0	NA	Third hendra case confirmed near lismore	https://www.business.qld.gov.au/industries/service-industries-professionals/service-industries/veterinary-surgeons/guidelines-hendra/incident-summary
Hendra virus	Australia	Scone	-32.041	150.855	horse	0	0	NA	An unvaccinated mare contracted hendra and had to be euthanised.	https://www.business.qld.gov.au/industries/service-industries-professionals/service-industries/veterinary-surgeons/guidelines-hendra/incident-summary
Hendra virus	Australia	Murwillumbah	-28.329	153.396	horse	0	0	NA	An unvaccinated horse contracted hendra and had to be euthanised.	https://www.business.qld.gov.au/industries/service-industries-professionals/service-industries/veterinary-surgeons/guidelines-hendra/incident-summary
Hendra virus	Australia	Bundaberg	-24.868	152.35	horse	0	0	NA	Unvaccinated horse euthanised.	https://www.business.qld.gov.au/industries/service-industries-professionals/service-industries/veterinary-surgeons/guidelines-hendra/incident-summary
Hendra virus	Australia	Beenleigh	-27.73	153.202	horse	0	0	NA	Horse euthanised and property quarantined after outbreak at a property.	https://www.business.qld.gov.au/industries/service-industries-professionals/service-industries/veterinary-surgeons/guidelines-hendra/incident-summary
Hendra virus	Australia	Murwillumbah	-28.329	153.396	horse	0	0	NA	A 31 year old stock horse died in the early hours of 20 june.	https://www.business.qld.gov.au/industries/service-industries-professionals/service-industries/veterinary-surgeons/guidelines-hendra/incident-summary
Hendra virus	Australia	Macksville	-30.716	152.918	horse	0	0	NA	Death of one horse, a second horse vaccinated, five cats and a dog were monitored.	https://www.business.qld.gov.au/industries/service-industries-professionals/service-industries/veterinary-surgeons/guidelines-hendra/incident-summary
Hendra virus	Australia	Murwillumbah	-28.329	153.396	horse	0	0	NA	Horse found dead after several days of illness. Hev confirmed as the cause of death.	https://www.business.qld.gov.au/industries/service-industries-professionals/service-industries/veterinary-surgeons/guidelines-hendra/incident-summary
Hendra virus	Australia	Macksville	-30.716	152.918	horse	0	0	NA	Six year old gelding died. Several other horses, dogs and cats were tested. A dog from the property tested positive for hev and was euthanised around 19 july 2013.	https://www.business.qld.gov.au/industries/service-industries-professionals/service-industries/veterinary-surgeons/guidelines-hendra/incident-summary
Hendra virus	Australia	Gold Coast	-28.016	153.431	horse	0	0	NA	One horse died. No other horses on property.	https://www.business.qld.gov.au/industries/service-industries-professionals/service-industries/veterinary-surgeons/guidelines-hendra/incident-summary
Hendra virus	Australia	Kempsey	-31.086	152.834	horse	0	0	NA	Eighteen-year-old unvaccinated mare died, other animals on property under observation.	https://www.business.qld.gov.au/industries/service-industries-professionals/service-industries/veterinary-surgeons/guidelines-hendra/incident-summary
Hendra virus	Australia	Tarampa	-27.35	152.55	horse	0	0	NA	One horse died. Hev virus confirmed.	https://www.business.qld.gov.au/industries/service-industries-professionals/service-industries/veterinary-surgeons/guidelines-hendra/incident-summary
Hendra virus	Australia	Gold Coast	-28.016	153.431	horse	0	0	NA	An unvaccinated infected horse euthanised and property quarantined.	https://www.business.qld.gov.au/industries/service-industries-professionals/service-industries/veterinary-surgeons/guidelines-hendra/incident-summary
Hendra virus	Australia	Kempsey	-31.086	152.834	horse	0	0	NA	Thirteen-year-old unvaccinated quarterhorse died, other animals on property were put under observation.	https://www.business.qld.gov.au/industries/service-industries-professionals/service-industries/veterinary-surgeons/guidelines-hendra/incident-summary
Hendra virus	Australia	Casino	-28.864	153.05	horse	0	0	NA	Horse died around 15 december 2016 after being ill for several weeks.	https://www.business.qld.gov.au/industries/service-industries-professionals/service-industries/veterinary-surgeons/guidelines-hendra/incident-summary
Nipah virus	Malaysia	Perak, Negeri Sembilan and Selangor	4.5904	100.921	human;bat;pig	265	105	40	Acute encephalitis	https://pubmed.ncbi.nlm.nih.gov/10823779/
Nipah virus	Singapore	Bukit Merah	1.2896	103.82	human	11	1	9	Signs of encephalitis and pneumonia	https://pubmed.ncbi.nlm.nih.gov/10520634/
Nipah virus	India	Siliguri	26.7271	88.4411	human	66	49	74	Encephalitis, person-to-person transmission	https://wwwnc.cdc.gov/eid/article/12/2/05-1247_article
Nipah virus	Bangladesh	Meherpur	23.7622	88.6348	human	13	9	69		https://wwwnc.cdc.gov/eid/article/10/12/04-0701_article
Nipah virus	Bangladesh	Naogaon	24.7936	88.8721	human	12	8	67		https://wwwnc.cdc.gov/eid/article/10/12/04-0701_article
Nipah virus	Bangladesh	Gopalganj	23	89.8	human	29	22	76		https://www.banglajol.info/index.php/FMCJ/article/view/6825
Nipah virus	Bangladesh	Faridpur	23.6071	89.8354	human	36	27	75	Person-to-person transmission. Some cases involved acute respiratory distress syndrome.	https://www.banglajol.info/index.php/FMCJ/article/view/6825
Nipah virus	Bangladesh	Tangail	24.2477	89.9152	human	12	11	92	Mortality rate of 92%. Contracted from drinking contaminated date palm juice.	http://dspace.icddrb.org/jspui/bitstream/123456789/4852/1/2005-ICDDRBHealthScienceBulletin-Vol3%284%29English.pdf
Nipah virus	India	Nadia	23.4283	88.5346	human	5	5	100	Person-to-person transmission.	http://dspace.icddrb.org/jspui/bitstream/123456789/4860/1/2007-ICDDRBHealthScienceBulletin-Vol5%284%29-English.pdf
Nipah virus	Bangladesh	Thakurgaon	26.0337	88.4617	human	7	3	43		https://www.cambridge.org/core/journals/epidemiology-and-infectioNArticle/nipah-virus-outbreak-with-persontoperson-transmission-in-a-district-of-bangladesh-2007/7C468D7713F68FD41E7706B9AB0AA034
Nipah virus	Bangladesh	Kushtia	23.9016	89.1	human	8	5	62		https://web.archive.org/web/20090203073526/http://www.icddrb.org/pub/publication.jsp?pubID=9038&classificationID=0&typeClassificationID=0
Nipah virus	Bangladesh	Manikganj and Rajbari	23.8637	90.0149	human	9	8	89		https://www.banglajol.info/index.php/AKMMCJ/article/view/7463/5619
Nipah virus	Bangladesh	Satkhira and Jessore	22.7185	89.1003	human	2	1	50		https://www.banglajol.info/index.php/JBSP/article/view/9764/7247
Nipah virus	Bangladesh	Faridpur	23.6071	89.8354	human	16	14	88	Acute encephalitis	https://pubmed.ncbi.nlm.nih.gov/23347678/
Nipah virus	Bangladesh	Hatibandha and Lalmonirht	25.6594	88.9674	human	24	17	71		https://old.iedcr.gov.bd/index.php/outbreak-at-lalmonirhat
Nipah virus	Bangladesh	Faridpur, Mnikganj, Magura, Rajshahi and Naogaon, Bangladesh	23.6071	89.8382	human	6	NA	NA		https://wwwnc.cdc.gov/eid/article/29/2/22-1379_article
Nipah virus	India	Kerala	10.8505	76.2711	human	18	17	94	Treatment using antivirals such as ribavirin was initiated	https://www.who.int/southeastasia/outbreaks-and-emergencies/health-emergency-information-risk-assessment/surveillance-and-risk-assessment/nipah-virus-outbreak-in-kerala
Nipah virus	India	Kochi	9.9312	76.2673	human	1	0	0	23-year-old student admitted to hospital. 338 people under observation. Discharged after treatment.
Nipah virus	India	Kozhikode	11.2588	75.7804	human	1	1	100	12-year-old boy died. Two healthcare workers infected.	https://www.frontiersin.org/articles/10.3389/fpubh.2022.818545/full
Nipah virus	Bangladesh	Rajshahi	24.3636	88.6138	human	14	10	71		https://www.who.int/emergencies/disease-outbreak-news/item/2023-DON442
Nipah virus	Bangladesh	Joypurhat, Manikganj, Pabna, Rajshahi, Naogaon	25.1053	89.0267	bat	NA	NA	NA	Bat roosts tested for nipah virus	https://www.ncbi.nlm.nih.gov/pmc/articles/PMC9239894/
Nipah virus	Cambodia	Battambang	13.0957	103.187	bat	NA	NA	NA	Bat roosts tested for nipah virus	https://www.ncbi.nlm.nih.gov/pmc/articles/PMC3371782/
Nipah virus	Bangladesh	Joypurhat district	25.0928	89.1185	bat	NA	NA	NA	Bats from outbreak area	https://www.ijidonline.com/article/S1201-9712(20)32245-1/fulltext#secsect0045
Nipah virus	Bangladesh	Raipur, Manikganj, Sylhet	23.7897	91.8361	bat	NA	NA	NA	Bats from outbreak area	https://www.ncbi.nlm.nih.gov/pmc/articles/PMC6302578/
Nipah virus	India	Kerala	10.8505	76.2711	bat	NA	NA	NA	Follow up after one human case of nipah virus infection	https://bmcinfectdis.biomedcentral.com/articles/10.1186/s12879-021-05865-7
Nipah virus	India	Maharashtra	19.7515	75.7139	bat	NA	NA	NA	Surveillance	https://www.sciencedirect.com/science/article/pii/S1876034121001167?via%3Dihub
Nipah virus	India	Kerala	10.8505	76.2711	bat	NA	NA	NA	Follow up after an outbreak	https://www.ncbi.nlm.nih.gov/pmc/articles/PMC6478210/
Nipah virus	India	West Bengal, Assam	22.9868	87.8549	bat	NA	NA	NA	Surveillance	https://www.ncbi.nlm.nih.gov/pmc/articles/PMC6022392/
Nipah virus	Malaysia	Tambun, Seremban, Sungai Buloh	3.2173	101.523	pig	NA	NA	NA		https://www.ncbi.nlm.nih.gov/pmc/articles/PMC3323361/
Nipah virus	Indonesia	Sumatera	-0.7893	101	bat	NA	NA	NA	Surveillance	https://journals.plos.org/plosone/article?id=10.1371/journal.pone.0069544
Nipah virus	Thailand	Singburi, Ayutthay, Saraburi, Angthong, Prachinburi	14.8847	100.281	bat	NA	NA	NA	Samples collected from colonies	https://www.liebertpub.com/doi/10.1089/vbz.2008.0105?url_ver=Z39.88-2003&rfr_id=ori%3Arid%3Acrossref.org&rfr_dat=cr_pub++0pubmed
Nipah virus	Thailand	Southern Thailand	7.8834	99.8536	bat	NA	NA	NA	Bat roosts tested for nipah virus	https://virologyj.biomedcentral.com/articles/10.1186/s12985-016-0510-x
Nipah-like virus	Philippines	Sultan Kudarat	6.6769	124.378	human;horse	17	9	53	Infection through hourse meet consumption. Deaths of horses and cats (suspected) were reported.	https://www.ncbi.nlm.nih.gov/pmc/articles/PMC4313660/
Cedar virus	Australia	Cedar Grove	-27.9674	152.562	bat	NA	NA	NA	Currently considered non-pathogenic	https://www.ncbi.nlm.nih.gov/pmc/articles/PMC3410871/
Ghana virus	Ghana	Kumasi	6.6885	-1.6198	bat	NA	NA	NA	Surveillance	https://journals.plos.org/plosone/article?id=10.1371/journal.pone.0006367
Ghana virus	Zambia	Lusaka, Livingstone, Mpulungu, Kasanka	-15.3982	28.2937	rodent;shrew	NA	NA	NA	Surveillance	https://www.microbiologyresearch.org/content/journal/jgv/10.1099/vir.0.058404-0#r6
Unnamed henipa-like virus (Drexler 2012)	Costa Rica	San Jose	9.93474	-84.0875	bat	NA	NA	NA	Surveillance	https://www.nature.com/articles/ncomms1796#Sec18
Unnamed henipa-like virus (Drexler 2012)	Ghana	Accra	5.61482	-0.205874	bat	NA	NA	NA	Surveillance	https://www.nature.com/articles/ncomms1796#Sec18
Unnamed henipa-like virus (Drexler 2012)	Republic of the Congo & Democratic Republic of the Congo (CON/DRC)	NA	-4.32758	15.3136	bat	NA	NA	NA	Surveillance	https://www.nature.com/articles/ncomms1796#Sec18
Unnamed henipa-like virus (Drexler 2012)	Gabon	Libreville	0.416198	9.46727	bat	NA	NA	NA	Surveillance	https://www.nature.com/articles/ncomms1796#Sec18
Unnamed henipa-like virus (Drexler 2012)	Republic of the Congo & Democratic Republic of the Congo (CON/DRC)	NA	-4.32758	15.3136	bat	NA	NA	NA	Surveillance	https://www.nature.com/articles/ncomms1796#Sec18
Unnamed henipa-like virus (Drexler 2012)	Gabon	Libreville	0.416198	9.46727	bat	NA	NA	NA	Surveillance	https://www.nature.com/articles/ncomms1796#Sec18
Unnamed henipa-like virus (Drexler 2012)	Republic of the Congo & Democratic Republic of the Congo (CON/DRC)	NA	-4.32758	15.3136	bat	NA	NA	NA	Surveillance	https://www.nature.com/articles/ncomms1796#Sec18
Unnamed henipa-like virus (Drexler 2012)	Central African Republic	Bangui	4.36122	18.555	bat	NA	NA	NA	Surveillance	https://www.nature.com/articles/ncomms1796#Sec18
Unnamed henipa-like virus (Drexler 2012)	Ghana	Accra	5.61482	-0.205874	bat	NA	NA	NA	Surveillance	https://www.nature.com/articles/ncomms1796#Sec18
Unnamed henipa-like virus (Drexler 2012)	Madagascar	Angavokely	-19.0732	46.7754	bat	NA	NA	NA	Surveillance	https://journals.asm.org/doi/10.1128/jvi.00921-22?url_ver=Z39.88-2003&rfr_id=ori:rid:crossref.org&rfr_dat=cr_pub%20%200pubmed
Unnamed henipa-like virus (Drexler 2012)	Ghana	Accra	5.61482	-0.205874	bat	NA	NA	NA	Surveillance	https://www.nature.com/articles/ncomms1796#Sec18
Unnamed henipa-like virus (Drexler 2012)	Rwanda	Ruhengeri	-1.4901	29.7359	bat	NA	NA	NA		https://www.mdpi.com/2414-6366/4/3/99
Unnamed henipa-like virus (Drexler 2012)	South Africa	Limpopo Province	-23.4018	29.7499	bat	NA	NA	NA	Surveillance	https://www.ncbi.nlm.nih.gov/pmc/articles/PMC8688450/
Unnamed henipa-like virus (Drexler 2012)	Zambia	Kasanka National park	-12.577	30.2031	bat	NA	NA	NA	Surveillance	https://www.ncbi.nlm.nih.gov/pmc/articles/PMC4064153/
Mòjiāng virus	China	NA	24.4759	101.343	human;rat	3	3	100	Severe pneumonia	https://www.ncbi.nlm.nih.gov/pmc/articles/PMC4036791/
Gamak and Daeryong viruses	Republic of Korea	Gangwon	37.8228	128.066	shrew	NA	NA	NA	Surveillance	https://www.mdpi.com/1999-4915/13/10/2020
Melian virus	Guinea	NA	9.9456	-11.8037	shrew	NA	NA	NA	Surveillance	https://academic.oup.com/ve/article/8/2/veac061/6623477
Denwin virus	Belgium	NA	50.5039	4.4699	shrew	NA	NA	NA	Surveillance	https://academic.oup.com/ve/article/8/2/veac061/6623477
Langya virus	China	NA	36.9848	118.027	human;shrew	35	0	0	Febrile disease	https://www.nejm.org/doi/full/10.1056/NEJMc2202705
Peixe-Boi virus	Brazil	Para	-1.45583	-48.5039	opposum	NA	NA	NA	Surveillance	https://www.mdpi.com/1999-4915/14/10/2167
NA, not applicable. CFR, case fatality rate. *If the city information could not be determined, the abbreviation "NA" was assigned, and the geocoordinates were randomly chosen within the country.
